# Supplementary material for: Prussian blue decorated mesoporous silica hybrid nanocarriers for photoacoustic imaging-guided synergistic chemo-photothermal combination therapy
Source: Royal Society of Chemistry journal article supplement (doi:10.1039/c8tb01214h), 2018-01-01
Supplement: c8tb01214h1.pdf [file c8tb01214h1.pdf]

## Electronic Supporting Information

### **Prussian blue decorated mesoporous silica hybrid nanocarriers for photoacoustic imaging-guided synergistic chemo-photothermal combination therapy**

Madhappan Santha Moorthy,<sup>a</sup> Giang Hoang,<sup>a</sup> Subramanian Bharathiraja,<sup>c</sup> Nhat Quang Bui,<sup>b</sup>  
Panchanathan Manivasagan,<sup>a</sup> Sudip Mondal,<sup>a</sup> Thi Tuong Vy Phan,<sup>a</sup> Hye Hyun Kim<sup>a</sup> and  
Junghwan Oh<sup>a,b,\*</sup>

<sup>a</sup> Marine-Integrated Bionics Research Center, Pukyong National University,  
Busan 48513, Korea.

<sup>b</sup> Department of Biomedical Engineering and Center for Marine-Integrated Biotechnology  
(BK21 Plus), Pukyong National University, Busan 608-737, Korea

<sup>c</sup> College of Pharmacy, University of Oklahoma Health Sciences Center, Oklahoma City,  
Oklahoma 73117, United States.

\*Email: [jungoh@pknu.ac.kr](mailto:jungoh@pknu.ac.kr)

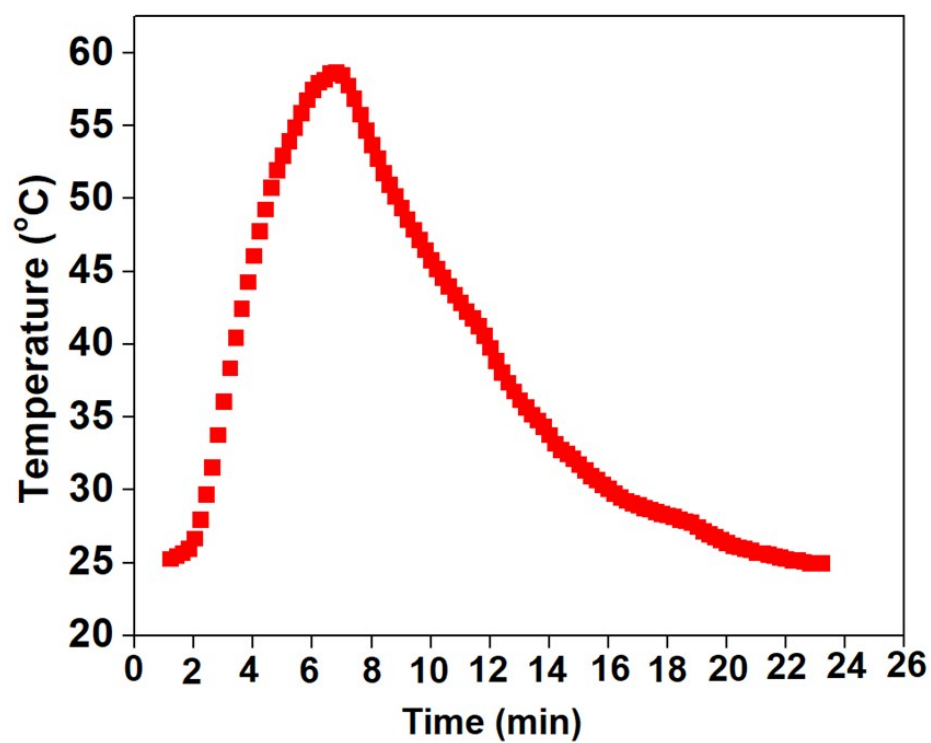

**Figure S1** Thermal curve of heating and cooling process of PB@MSH-EDA NPs dispersed in water (200  $\mu\text{g/mL}$ ) and irradiated with 808 nm laser at 2  $\text{W/cm}^2$ .

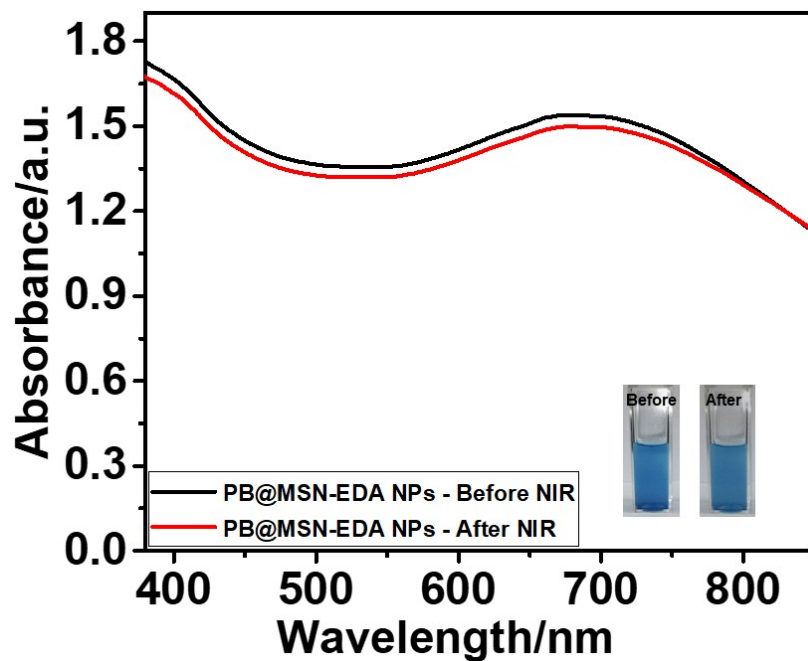

**Figure S2** UV-vis absorption curves of PB@MSH-EDA NPs dispersed in water and measured before and after irradiation of 808 nm laser at 2 W/cm<sup>2</sup> for 5 min.

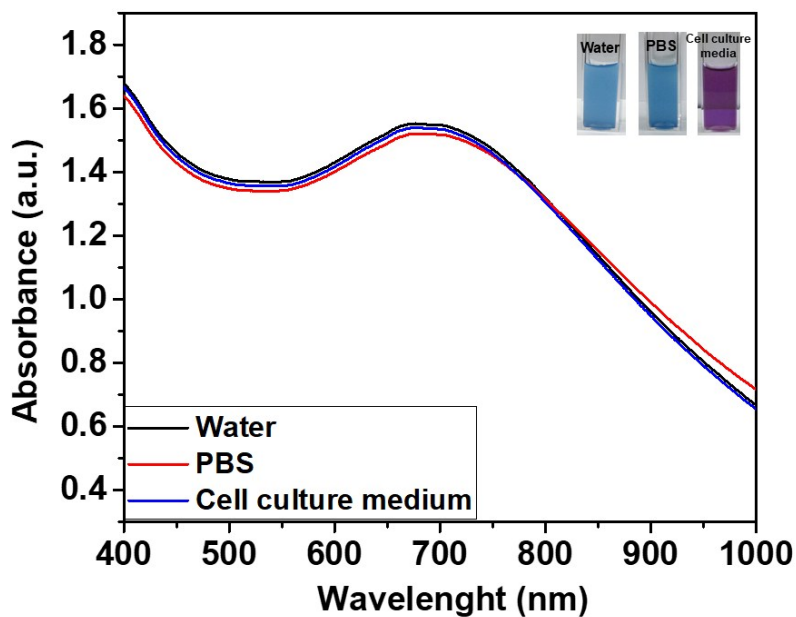

**Figure S3** UV-vis absorption curves of the stability of PB@MSH-EDA NPs dispersed in different medium and stored for 3 months.

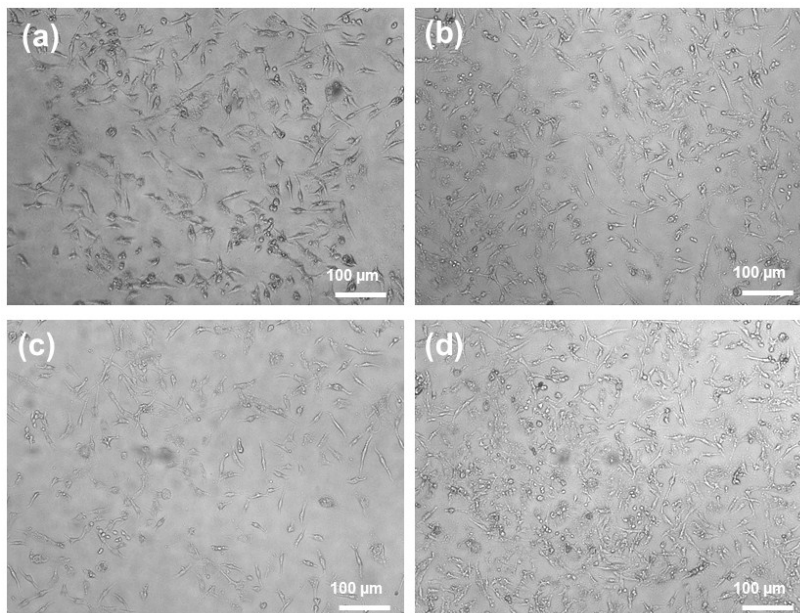

**Figure S4** Bright-field images of MDA-MB-231 cells in different conditions and after the treatment of (a) only PBS, (b) PBS + NIR, (c) PB@MSH-EDA/Dox NPs without NIR and (d) PB@MSH-EDA/Dox + NIR laser irradiated at 808 nm, 2 W/cm<sup>2</sup> for 5 min.

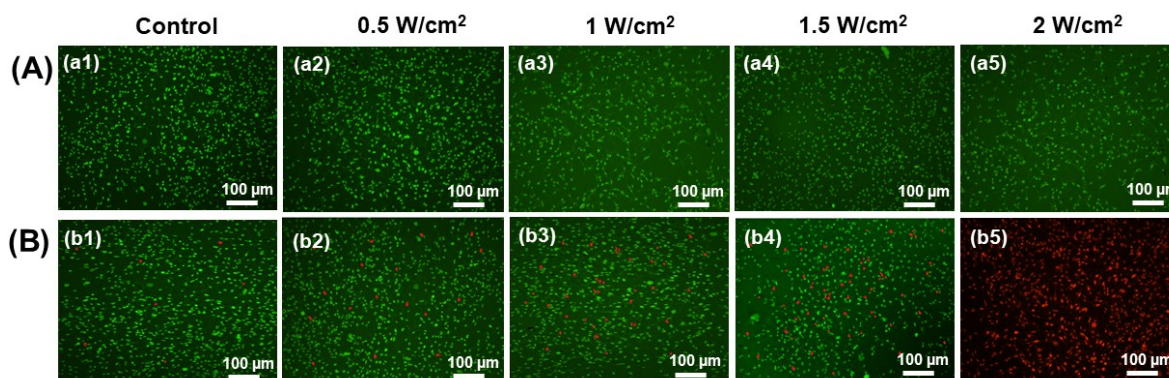

**Figure S5** Merged fluorescence microscopic images of MDA-MB-231 cells without treating (A) control; and (B) after treatment of PB@MSH-EDA NPs (200 µg/mL) and further irradiated with 808 nm NIR laser at different laser power intensities (0.5 W/cm<sup>2</sup>, 1 W/cm<sup>2</sup>, 1.5 W/cm<sup>2</sup> and 2 W/cm<sup>2</sup>, respectively, for 5 min) (20x magnification). The cells were stained by AO (live cells: green) and EB (dead cells: red).

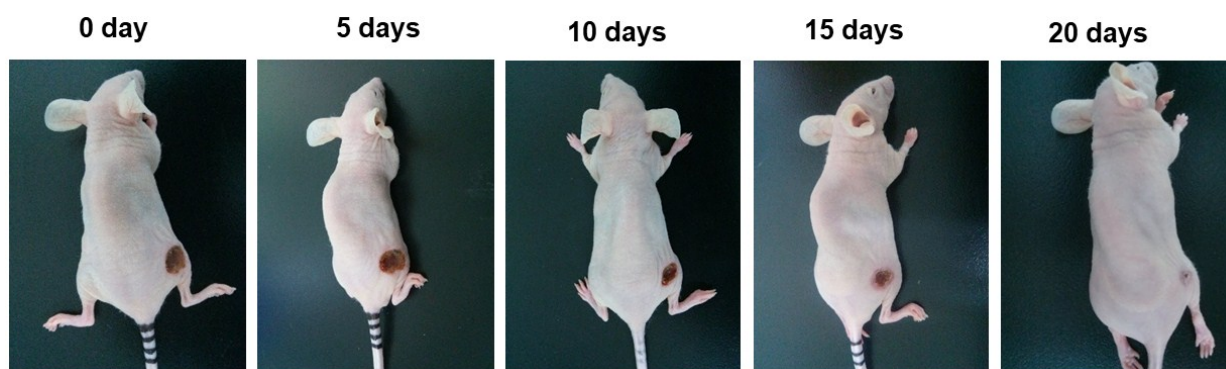

**Figure S6** Photographic images of MDA-MB-231 tumor-bearing nude mice curing after intratumoral injection of PB@MSH-EDA NPs followed by irradiation of mice with 808 nm laser with the laser power density at 2 W/cm<sup>2</sup> for 5 min.

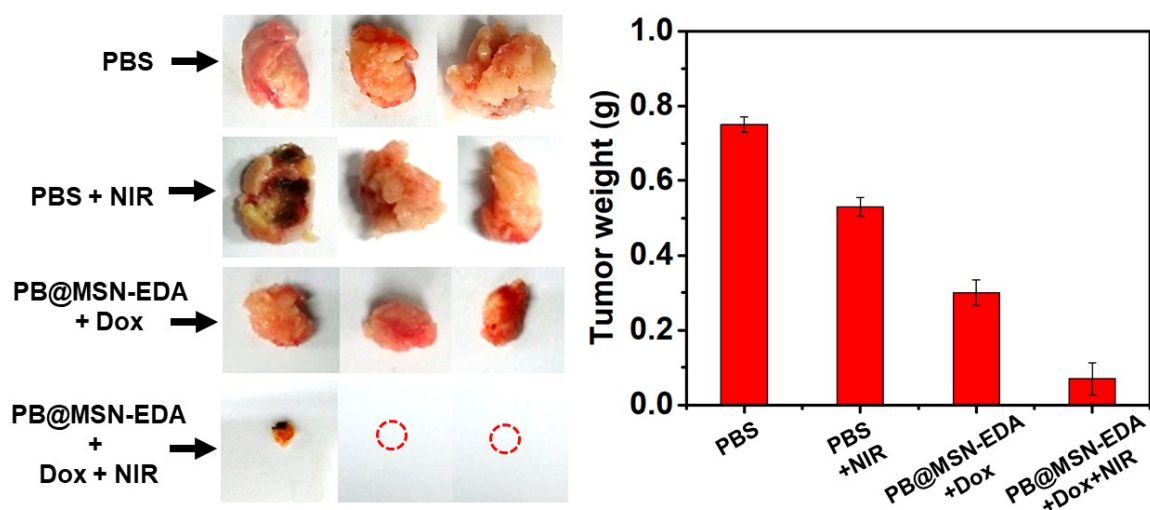

**Figure S7** (A) The tumor images obtained from the sacrificed mice at the end of experiments; and (B) the weight of tumor at different groups of nude mice after 20 days of only PBS, PBS + NIR, PB@MSH-EDA/Dox NPs and PB@MSH-EDA/Dox + NIR irradiation, respectively.

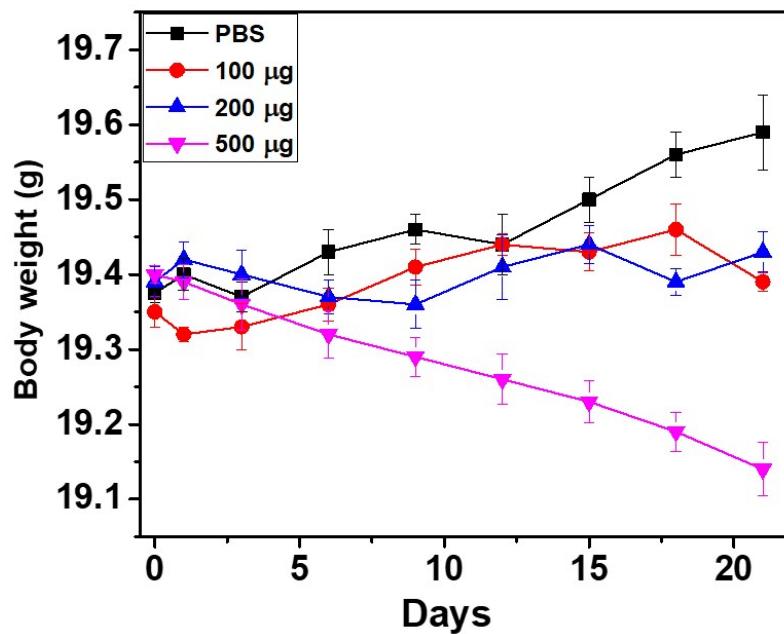

**Figure S8** The estimation of animal body weight by treating the mice with different concentrations of PB@MSH-EDA NPs, respectively. Data represent mean  $\pm$  standard deviation.

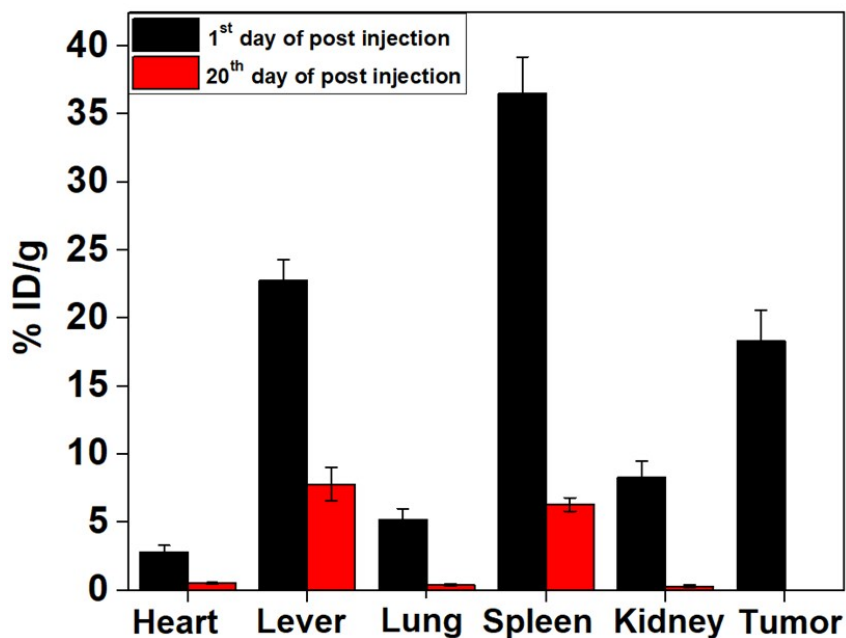

**Figure S9** Biodistribution of PB@MSH-EDA NPs in major organs and tumor in nude mice. The results were presented as mean  $\pm$  standard deviation.



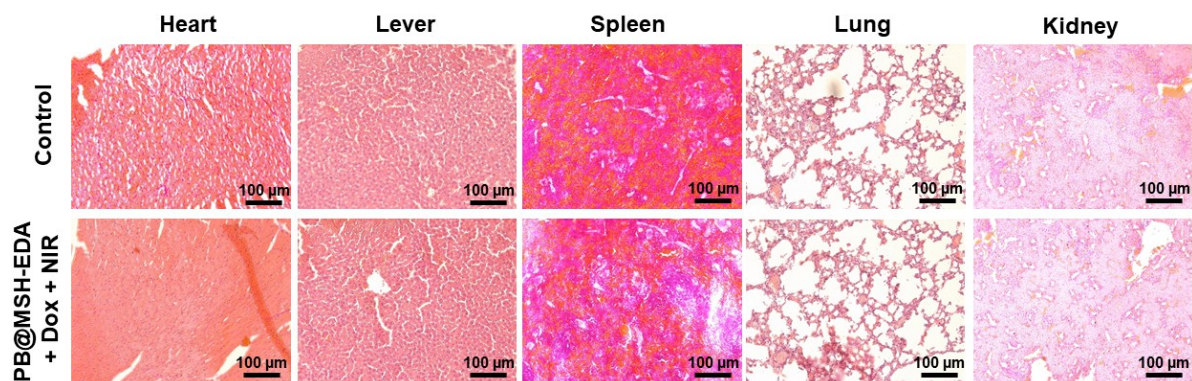

**Figure S10** Fluorescence microscopic images of H&E staining of major organ slices collected from mice of control group and the combination therapy group after 20 days of treatment. No considerable sign of organ damage was observed in major organs of mice. Scale bar = 100 µm.
